# Supplementary material for: Alcohol consumption in the general population is associated with structural changes in multiple organ systems
Source: eLife. 2021 Jun 1;10:e65325. doi: 10.7554/eLife.65325 (PMC8192119; doi:10.7554/eLife.65325)
Supplement: Supplementary file 2. [file elife-65325-supp2.docx]

**Supplementary Table 2. Coefficients for log2 alcohol and age in an expanded model for cardiac (N=11,821) and aortic (N=12,376) imaging phenotypes including tests of interactions between log2 alcohol and age.**

|  | **Alcohol** | **Alcohol x Age** | **Age** |
| --- | --- | --- | --- |
| **Heart** | ***Beta, P-value*** | ***Beta, P-value*** | ***Beta, P-value*** |
| Left ventricular mass index | 1.84, 3.2×10-10 | -0.02, 3.5×10-7 | -0.01, 0.42 |
| Left ventricular end-diastolic volume index | 2.25, 6.9×10-5 | -0.03, 3.5×10-3 | -0.24, 3.4×10-11 |
| Left ventricular ejection fraction (%) | 0.17, 0.50 | -0.002, 0.62 | 0.04, 6.8×10-3 |
| Right ventricular end-diastolic volume index (ml/m2) | 1.99, 1.0×10-3 | -0.02,0.018 | -0.25, 4.7×10-11 |
| Right ventricular ejection fraction (%) | -0.04, 0.87 | 0.001, 0.72 | 0.04, 0.024 |
| Left atrial volume index (ml/m2) | 0.59, 0.23 | -0.002, 0.75 | -0.11, 4.4×10-4 |
| Right atrial volume index (ml/m2) | 0.25, 0.65 | 1.4x10-4, 0.99 | 0.04, 0.22 |
| **Aorta** |  |  |  |
| Ascending aortic area index (mm2/m2) | 7.4, 0.06 | -0.08, 0.22 | 3.0, 1.5×10-34 |
| Descending aortic area index (mm2/m2) | 5.9, 6.9×10-4 | -0.07, 8.1×10-3 | 2.1, 2.9×10-83 |
| Ascending aortic distensibility (%/mmHg) | -0.21, 1.4×10-7 | 0.003, 2.6×10-7 | -0.1, <1.0×10-300 |
| Descending aortic distensibility (%/mmHg) | -0.20, 4.3×10-6 | 0.003, 2.7×10-5 | -0.10, 6.0×10-293 |

Regression model: Imaging phenotype=log2 Alchohol + log2Alcohol* Age + Age + Sex + Ethnicity + BMI + Hypertension + Diabetes + Ever smoked + College degree
